# Supplementary material
Source: publisher site journal article supplement (https://www.spandidos-publications.com/8080/downloadSupplementary)
Supplement: Supplementary file 1 [file downloadSupplementary]

## Sheet: 附表1
Table SII. Differential expression analysis of 100 disulfidptosis-related genes in cholangiocarcinoma vs. adjacent normal tissues.
Gene	Tumor (Mean±SD)	Normal (Mean±SD)	P-value
NCKAP1	Tumor(7.36±0.30)	Normal(6.54±0.17)	3.6e-15
DBN1	Tumor(5.87±0.32)	Normal(5.14±0.15)	2.1e-14
EPAS1	Tumor(6.55±0.47)	Normal(7.53±0.27)	3e-14
FANCI	Tumor(4.57±0.56)	Normal(3.56±0.25)	3.9e-14
GTF2I	Tumor(7.93±0.42)	Normal(7.00±0.28)	4.9e-14
DHX9	Tumor(6.67±0.29)	Normal(6.10±0.15)	5.7e-14
DSTN	Tumor(7.41±0.31)	Normal(6.79±0.14)	7e-14
PRC1	Tumor(5.11±0.67)	Normal(3.76±0.39)	1.3e-13
CD2AP	Tumor(7.18±0.43)	Normal(6.37±0.19)	1.6e-13
FLNA	Tumor(7.13±0.55)	Normal(5.98±0.31)	2e-13
ABI2	Tumor(5.96±0.38)	Normal(5.20±0.18)	2.2e-13
DECR1	Tumor(5.14±0.39)	Normal(6.02±0.25)	4.1e-13
IQGAP1	Tumor(8.08±0.54)	Normal(6.99±0.34)	5.1e-13
TARDBP	Tumor(6.99±0.26)	Normal(7.45±0.20)	1.3e-12
OXSM	Tumor(3.98±0.24)	Normal(4.51±0.21)	1.4e-12
ARMC6	Tumor(4.77±0.15)	Normal(5.19±0.22)	2.1e-12
RAC1	Tumor(8.02±0.27)	Normal(7.59±0.14)	5.3e-12
UBASH3B	Tumor(5.67±0.98)	Normal(4.23±0.36)	1.1e-11
HNRNPA3	Tumor(8.46±0.19)	Normal(8.13±0.15)	1.6e-11
ACTN4	Tumor(7.90±0.34)	Normal(7.37±0.21)	3.1e-11
SLC7A11	Tumor(3.77±1.23)	Normal(2.70±0.18)	4.4e-11
CHCHD3	Tumor(6.13±0.29)	Normal(5.75±0.07)	5.5e-11
HNRNPU	Tumor(8.14±0.28)	Normal(7.76±0.14)	9.6e-11
NDUFC1	Tumor(5.74±0.26)	Normal(6.17±0.26)	7.6e-10
CNOT1	Tumor(7.66±0.33)	Normal(7.25±0.22)	8.3e-10
NDUFS1	Tumor(6.38±0.30)	Normal(6.82±0.19)	1.7e-09
MYH9	Tumor(7.30±0.36)	Normal(6.79±0.27)	2e-09
RUFY1	Tumor(5.56±0.25)	Normal(5.26±0.11)	6.4e-09
SLC2A1	Tumor(5.66±1.03)	Normal(4.68±0.18)	7.9e-09
SMPD4	Tumor(5.85±0.19)	Normal(5.62±0.12)	8.5e-09
GYS1	Tumor(4.96±0.24)	Normal(4.67±0.11)	1.3e-08
MYH2	Tumor(2.73±0.07)	Normal(2.81±0.06)	6.1e-08
MYL6B	Tumor(5.52±0.26)	Normal(5.23±0.16)	6.8e-08
MYH3	Tumor(3.10±0.12)	Normal(3.20±0.10)	1.1e-07
NDUFA11	Tumor(6.48±0.28)	Normal(6.80±0.25)	2e-07
HNRNPH1	Tumor(7.18±0.23)	Normal(6.93±0.19)	2.4e-07
IPO7	Tumor(7.71±0.51)	Normal(7.24±0.27)	5.5e-07
MYH11	Tumor(5.61±0.78)	Normal(4.90±0.35)	2.4e-06
RPA1	Tumor(5.59±0.35)	Normal(5.27±0.26)	3.2e-06
ACTB	Tumor(8.86±0.20)	Normal(8.67±0.15)	4e-06
PML	Tumor(4.97±0.23)	Normal(4.78±0.11)	4e-06
CHD4	Tumor(7.16±0.35)	Normal(6.82±0.24)	4.7e-06
MYH10	Tumor(5.18±0.54)	Normal(5.62±0.28)	4.9e-06
NLN	Tumor(5.08±0.44)	Normal(5.45±0.25)	7e-06
MYH8	Tumor(2.57±0.07)	Normal(2.63±0.05)	7.7e-06
MYH6	Tumor(3.51±0.10)	Normal(3.60±0.07)	8.2e-06
PRDX1	Tumor(8.18±0.40)	Normal(8.52±0.23)	3.4e-05
FLNB	Tumor(6.18±0.54)	Normal(6.52±0.25)	6e-05
SAFB2	Tumor(6.21±0.22)	Normal(6.03±0.19)	7.8e-05
WASF2	Tumor(7.28±0.34)	Normal(6.92±0.38)	0.00011
RPN1	Tumor(7.26±0.24)	Normal(7.43±0.14)	0.00013
HNRNPH3	Tumor(7.09±0.26)	Normal(6.89±0.17)	0.00015
GCN1L1	Tumor(5.87±0.29)	Normal(5.64±0.27)	0.0003
MYL6	Tumor(8.39±0.30)	Normal(8.19±0.24)	0.00046
ANP32E	Tumor(6.60±0.41)	Normal(6.32±0.23)	0.00049
STRAP	Tumor(7.13±0.33)	Normal(6.90±0.22)	0.00053
MYH1	Tumor(2.87±0.08)	Normal(2.92±0.06)	0.0006
NUBPL	Tumor(4.36±0.29)	Normal(4.56±0.25)	0.00079
MYH13	Tumor(3.06±0.13)	Normal(3.11±0.07)	0.00088
SQSTM1	Tumor(6.27±0.25)	Normal(6.43±0.19)	0.0012
SART3	Tumor(6.07±0.33)	Normal(5.91±0.18)	0.0032
NSUN2	Tumor(6.30±0.26)	Normal(6.43±0.19)	0.0033
TLN2	Tumor(3.94±0.22)	Normal(3.81±0.09)	0.0039
RNH1	Tumor(5.99±0.22)	Normal(6.10±0.14)	0.0057
MYH7	Tumor(3.71±0.09)	Normal(3.76±0.08)	0.098
MYH7B	Tumor(4.35±0.10)	Normal(4.40±0.09)	0.099
RRP1	Tumor(4.65±0.23)	Normal(4.74±0.19)	0.011
TNKS1BP1	Tumor(5.74±0.27)	Normal(5.59±0.20)	0.012
FLNC	Tumor(4.74±0.20)	Normal(4.65±0.10)	0.02
INF2	Tumor(5.58±0.22)	Normal(5.65±0.12)	0.021
PDLIM1	Tumor(7.56±0.43)	Normal(7.75±0.22)	0.021
PCBP3	Tumor(4.41±0.13)	Normal(4.44±0.07)	0.032
AAAS	Tumor(5.86±0.31)	Normal(5.98±0.23)	0.049
ACTN1	Tumor(6.94±0.44)	Normal(6.75±0.23)	0.049
CYFIP1	Tumor(6.58±0.27)	Normal(6.46±0.21)	0.061
MYH4	Tumor(2.74±0.13)	Normal(2.76±0.11)	0.062
NDUFS2	Tumor(6.96±0.34)	Normal(7.07±0.12)	0.064
PPM1F	Tumor(4.95±0.11)	Normal(5.00±0.11)	0.072
NDUFA10	Tumor(5.53±0.21)	Normal(5.60±0.11)	0.089
TRIP6	Tumor(5.98±0.25)	Normal(5.91±0.17)	0.1
TLN1	Tumor(6.41±0.27)	Normal(6.48±0.22)	0.14
MRPS17	Tumor(5.47±0.35)	Normal(5.56±0.27)	0.17
PCBP2	Tumor(8.59±0.20)	Normal(8.54±0.12)	0.21
ACTN2	Tumor(3.16±0.21)	Normal(3.13±0.09)	0.31
SAMM50	Tumor(5.52±0.29)	Normal(5.45±0.19)	0.31
ACTN3	Tumor(4.38±0.12)	Normal(4.40±0.10)	0.39
CAPZB	Tumor(6.21±0.25)	Normal(6.25±0.12)	0.4
SPG20	Tumor(4.69±0.47)	Normal(4.66±0.26)	0.41
LRPPRC	Tumor(6.57±0.40)	Normal(6.47±0.16)	0.42
PCBP1	Tumor(9.19±0.23)	Normal(9.17±0.13)	0.63
IPO4	Tumor(5.64±0.31)	Normal(5.62±0.20)	0.69
SAFB	Tumor(6.73±0.22)	Normal(6.72±0.13)	0.72
SLC3A2	Tumor(5.92±0.26)	Normal(5.90±0.21)	0.75
ATXN10	Tumor(6.20±0.28)	Normal(6.23±0.12)	0.77
HNRNPH2	Tumor(7.36±0.30)	Normal(7.32±0.22)	0.83
HNRNPM	Tumor(7.75±0.19)	Normal(7.75±0.18)	0.86
ZHX2	Tumor(5.66±0.43)	Normal(5.68±0.22)	0.92
BRK1	Tumor(7.79±0.37)	Normal(7.77±0.31)	0.94
MYH14	Tumor(5.70±0.37)	Normal(5.69±0.11)	0.94
BOP1	Tumor(5.98±0.19)	Normal(5.98±0.13)	0.96
